# Supplementary material for: Brief communication: Improving ERA5-Land soil temperature in permafrost regions using an optimized multi-layer snow scheme
Source: Copernicus journal article supplement (doi:10.5194/tc-2022-71), 2022-04-12
Supplement: Supplementary file [file tc-2022-71-AC2-supplement.pdf]

# **Author's Responses to RC2's comments on “*Brief communication: Improving ERA5-Land soil temperature in permafrost regions using an optimized multi-layer snow scheme*”**

Bin Cao<sup>1</sup>, Gabriele Arduini<sup>2</sup>, Ervin Zsoter<sup>2,3</sup>

<sup>1</sup>National Tibetan Plateau Data Center, Institute of Tibetan Plateau Research, Chinese Academy of Sciences, Beijing, China

<sup>2</sup>European Centre for Medium-Range Weather Forecasts, Reading, UK

<sup>3</sup>Department of Geography and Environmental Science, University of Reading, Reading, UK

**Correspondence:** Bin Cao (bin.cao@itpcas.ac.cn)

The authors would like to thank the reviewer for constructive feedback, and the thorough assessment of the manuscript. Below we provide a point-to-point response to each comment, reviewer comments are given in black, responses are given in blue. Additionally, we have included details of how we intend to address these changes in a revised submission. Revised figure/table are present at the end of the responses.

I have produced this review ‘blind’ and have not looked at the comments posted by the authors that respond to the first reviewer. So apologies if there is any repetition in the points I make.

**Response:** Thanks for the independent comments.

This paper presents the (hitherto unknown) impacts of the implementation of a new multi-layer snow (MLS) scheme into the land surface component of ERA5 reanalysis (HTESEL) which was currently operating with a single-layer snow scheme. ERA5 outputs are widely used by the community so a critical appraisal of its ability to simulate permafrost regions is welcomed and necessary. One of the limitations of the current model set up is that thermal snow metamorphism is programmed to not respond to thermal forcing above densities of 150kg/m<sup>3</sup> therefore the simulated densities are artificially low and because of thermal conductivity of snow, ground temperatures biased high. A sensible suite of comparative experiments were proposed to demonstrate how each incremental adjustment to the snow scheme affected soil temperature and led to moderate improvements in some regions (Europe, Alaska and complex terrain) but little/no improvement in others (North America/Tibet) – which is very interesting. Inevitably, the representation of snow and its layer properties will not be accurate – we see this in most/all major land surface models but addition of a multi-layer scheme is a good step forward.

The average temperature biases are still quite large over some regions so this should be reported in more detail. For this reason I think Figure 2 could be better used to illustrate exactly where the world ERA5 gets subsurface temperatures wrong/right. Please see my major comments.

**Response:** We agree spatial information of revised simulations are missing in the current format. The handling editor also reported similar concern in the previous review before publication in TCD. We intended to revise Figure 2 to add the spatial performance of HTESEL with a MLS in snow and soil temperature representations (see below).

The snow depth was improved at most sites in MLS (Figure 2A–C). For the Tibetan Plateau, a remarkable uncertainty is the atmospheric forcing. The daily near-surface air temperature is significantly underestimated by about 5.8°C. This means a perfect snow and soil schemes will lead to cold biased soil temperatures. The Exp. MLS-Dis+Den simulation slightly reduced snow depth bias (see Figure Snow in TP) over the TP but leads to an even underestimated soil temperature due to the stronger snow thermal conductivity. The snow depth overestimation could be traced back to the overestimated snowfall (Orsolini et al., 2019). In sec. 5.1 of the revised submission, we intend to change as below to clarify.

*“On the Tibetan Plateau, the soil temperature in Exp. MLS-Dis+Den is found to have a worse performance compared to ERA5L. This is because  $T_a$  is significantly underestimated by about  $-5.8 \pm 3.7^\circ\text{C}$  over the Tibetan Plateau, which could account for the cold bias of soil temperature, i.e., from  $-3.3$  to  $-2.7^\circ\text{C}$  (Table 2). While the new MLS reduced overestimated snow depth (Figure 2B), it suppressed snow insulation and hence enhanced soil temperature cold bias.”*

*“Orsolini et al. (2019) revealed that excessive winter precipitation in ERA5(-Land) might be an additional uncertainty*

*for the remarkable overestimation of snow depth over the Tibetan Plateau.”*

We agree the warm bias of soil temperature in North America and Alaska (both in summer and winter) were still remarkable, although the new MLS reduced the cold bias by about 1.9/1.8 °C in North America/Alaska. This was thought to arise from lacking a soil organic representation in the soil column, and we intend to revise the discussion of soil organic matter (in sec 5.1) as below to clarify.

*“Summer soil temperatures in all experiments are similar since the revised snow scheme mainly affects winter temperatures. In North America and Alaska, soil temperature are generally have a significant warm bias (Figure 2). This is believed to arise due to a lack of soil organic matter representation in HTESSEL soil thermal properties (Park, 2018).”*

A detailed evaluation and improvement of the MLS requires stand-alone simulations that forced by in situ atmospheric observations.

Overall this is a sound paper which makes a first attempt to improve soil temperature reconstructions and is appropriate for a Brief Communication format but I think at least one Figure could be revised in order to squeeze some more detail out of the analyses provided. Please see my major/minor comments.

#### Major:

- **More detail:** I feel interested readers would definitely like to see spatial patterns of temperature biases, rather than summary figures as are presented here so that Fig. 3 (permafrost map) may be put into better context about what is driving the discrepancy(ies). The high levels of aggregation (over time, depth and space) are likely masking some very interesting features of this output. The under representation of permafrost regions seems to be related to soil temperatures being too warm in Winter in all cases. Suggestion: Why not show a 4 (region) x 4 (model experiment)-panelled figure of maps of 0.07-0.28m DJF Bias for the Northern Hemisphere so readers can see what the spatial patterns of this discrepancy looks like ?

Response: We agree the manuscript will significantly benefit from a spatial patterns of soil temperature biases. Based on the requirements of TC, the brief communication should have a maximum of 3 figures and/or tables. The manuscript in its current format is already oversized with 3 figure and 2 tables. In addition, we need to make a balance of snow and soil temperature in the manuscript. For these reasons, we intend to add the spatial snow depth and soil temperature bias into Figure 2 rather than present in a separate one. In addition, we intend to add a brief clarification of snow depth performance in Sec. 5.1 (see below).

*“Snow depth is generally improved at most observed sites (Figure 2A and B), and the overestimation in ERA5L was reduced from 0.19 m to 0.08–0.11 m in the MLS (Figure 2C). However, there is little improvement (i.e., 3 cm) over the Tibetan Plateau. Orsolini et al. (2019) revealed that excessive winter precipitation in ERA5(-Land) might be an additional uncertainty for the remarkable overestimation of snow depth over the Tibetan Plateau.”*

- **Thermal Conductivity:** Although I am happy Calonne is an appropriate choice for thermal conductivity parameterisation I'd like to ask the authors for clarification about including the water vapour term which isn't included in Calonne's original equation. We know water vapour diffusion affects thermal conductivity and is difficult to represent. However, Calonne developed their equation based on a quadratic line of best fit using observations of snow density and thermal conductivity. Although the equation is presented solely as a function of density, it is highly probable that when the snow and density measurements featured in Calonne's Fig. 1 were taken that there might have been some water vapour diffusion happening so this effect could (or maybe not) already be implicitly included in the equation by Calonne. My concern is that the addition of the water vapour term by the authors may cause this effect to be 'double counted'. I'd recommend the authors re-run one of the experiments (e.g. MLS Dis+Den since this provides the biggest improvement) without the additional water vapour diffusion term in the Calonne equation and report back on whether omission of this term causes a significant change in the results, or not.

Response: We agree the water vapor has significant influences on snow thermal conductivity, and treating in different parameterizations would affect simulated soil temperature (Figure Thermal conductivity). However, the parameterization present by Calonne et al. (2011) considered “purely conductive effects (i.e., conduction through ice and interstitial air)” and non-conductive processes (i.e., water vapor diffusion and air convection) was separately (see paragraph 21 from Calonne et al. (2011)). Calonne et al. (2011) also clarified in the Abstract and we simply copied the text here.

*“Only conduction through ice and interstitial air were considered. The obtained values are strongly correlated to snow density.”*

In addition, Fourteau et al. (2020) reported that the method proposed by Calonne et al. (2011) was *"treating heat conduction as decoupled from vapor transport"* (please see the last sentence in paragraph 2 from Fourteau et al. (2020)).

In such a case, involving an additional water vapor diffusion in snow effective thermal conductivity is reasonable. For this reason, we don't think the manuscript will benefit from a additional simulation experiment without considering the water vapor of thermal conductivity. Instead, we intend to revise as below to clarify.

*"For example, the effects of heat conduction and water vapor ( $\lambda_v$ ) on snow thermal conductivity ( $\lambda_{sn}$ ,  $W m^{-1} K^{-1}$ ) is treated separately in MLS. The former was parameterized following Calonne et al. (2011), and the later was calculated using equation from Sun et al. (1999)."*

- **Model spin up:** As an experienced user of CESM2.0, which I know is not the model considered here, we've found that subsurface temperatures are extremely sensitive to spin up procedure. The authors should include information about their spin up procedure and whether they have tested the sensitivity of the results to it. See next point.....

Response: RC1 had the similar comments. The offline simulation experiments in this study were all initialised from ERA5 on 1 January 1979. Therefore a 21-year spin-up period is considered before analysing the data (2001–2018). We intend to add the model initialization and spin-up period in Sec.3 Model configuration and experiment (see below).

*"The offline simulation experiments in this study were all initialised from ERA5 on 1 January 1979, and the period of 1979–2000 is used to spin up before simulation and analyses were conducted."*

- **Permafrost extent:** The revisions don't manage to capture southern extent at all but you are only considering 2001–2002. Could this just be an anomalous year to compare to ? Or could this be a result of the spin up procedure contributing to the model state being artificially too warm to start with ? I'm not sure you should read too much into representation of a single year. Perhaps you could add some extra lines to map to show annual extent of the permafrost region as predicted by the model over the time period considered so that the reader can understand the variability of the predicted extent over the time period considered ?

Response: The simulated permafrost region is generally smaller than "observed" estimate, and hence could not "capture" the permafrost southern boundary. The 21-years spin-up for soil temperature within 1.89 m is robust (please see our responses to your previous comment).

The underestimated permafrost region could be raised from many reasons, in this study, we proposed three aspects:

- [1] Period gap: Our simulation covers the period of 2001–2018 while IPA map represents permafrost condition in a few decades prior to 1990. We hence could expect simulated permafrost area here is lower than the IPA map due to climate warming.
- [2] Model uncertainties: Given the fact that permafrost could be present several meters beneath the ground surface even in continuous and discontinuous permafrost zones, current HTESSEL or ECLand model with a very shallow soil profile (i.e., 1.89 m) is not sufficient for deep permafrost simulations. In this context, the simulated permafrost here remains as "near-surface permafrost", and hence could be smaller than the IPA map.
- [3] Fundamental challenge: Because permafrost extent is a variable that cannot be observed, we fundamentally lack possibilities for proper validation Gruber (2012). The observed permafrost extent, i.e., IPA map, is subjected to significant uncertainties although it was widely used (Cao et al., 2019).

In section 5.2, we intend to add the following sentences to clarify.

*"Besides to the model uncertainties, such as the shallow soil profile, the smaller simulated permafrost area compared to the IPA map could be traced to the different periods represented, i.e., a few decades prior to 1990 for the IPA map and 2001–2018 for ERA5L as well as the simulation experiments. Furthermore, because permafrost is a hidden phenomenon, its extent is fundamentally difficult to be observed and validation."*

- **Multi-layer snow scheme:** – Perhaps the authors could comment on how well (or not) the scheme simulates the different types of snow we see across the northern hemisphere. It's good getting density and thermal conductivity right but if the snow layering and density is not accurate (which I suspect it likely is) this will feed into erroneous thermal conductivity and soil temperatures. Just a comment or acknowledgement required.

Response: We intend to revise the Figure 2 (also see our responses to your major comment 1). In Sec. 5.1 Soil temperature, a brief comment on snow depth performances was added. However, We believe that an evaluation of snow density and snow internal properties is beyond the scope of this work.

*"Snow depth is generally improved at most observed sites (Figure 2A and B), and the overestimation in ERA5L was reduced from 0.19 m to 0.08–0.11 m in the MLS (Figure 2C). However, there is little improvement (i.e, 3 cm) over the Tibetan Plateau. Orsolini et al. (2019) revealed that excessive winter precipitation in ERA5(-Land) might be an additional uncertainty for the remarkable overestimation of snow depth over the Tibetan Plateau."*

#### Minor:

- Figure 1: Typo: Greek symbols differ between being Cepsilon in the legend and Cxi in the figure caption. I think you need to change epsilon?

Response: Thanks! In the Figure legend, it should be changed to  $c_{\xi}$ . In a revised submission, we'll change to figure 1 as below.

- Figure 2 (f) Do the blue and red colours refer to ERA5L and MLS-Dis+Den ? If so please add some text to caption for clarity. But please consider revising this figure to show more geographical detail in the biases as per my major comment.

Response: Yes, red means to ERA5L and blue for Exp. MLS-Dis+Den. The legend in subfig a is applicable for all figures. We revised the figure with spatial soil temperature bias, and the legend text was moved to the bottom right (please see the revised Figure 2 at the end of the response.).

- Line 6: Over which region ?

Response: At the observed stations in high-latitude permafrost regions. We intend to change as below in a revised submission.

*"The daily warm bias in winter was reduced by about 0.6–3.0 °C at the 522 observed stations in the high-latitude permafrost regions."*

- Line 7: Be specific – for which time period are the permafrost area simulations relevant for ?

Response: Will be revised to "...11.0–12.9  $\times 10^6$  km<sup>2</sup> during 2001–2018"....

- Line 65 – These values were derived by Sun et al. themselves, it appears, not Jordan according to the Sun et al. 1999 paper – See their Appendix A.

Response: Revised to the corrected reference of Sun et al. (1999).

- Line 68: What does 'optimized' mean in this context ? When I think of optimization I think of tuning parameters to replicate observations, which doesn't appear to be the case here. The following sentences just simply describe two techniques the introduce sperate densification and layering for differing terrains.

Response: The tile of Sec 2.3 will be changed as "Revised multi-layer snow scheme" in a revised submission.

- Line 121: Land type, or vegetation coverage can have significant effects on the way that snow models evolve the physical properties of the snow. Presenting the data in Figure 2 as maps of biases may give clues as to whether this is a factor.

Response: Spatial bias of snow depth and soil temperature will be added in Figure 2 in a revised submission.

- Line 121: Why is the word 'BIAS' capitalised ? Is it a software or do you simply mean 'bias' ?

Response: Yes, we meant bias. The '*BIAS*' will be changed to 'bias' throughout the manuscript.

- Line 126-127: Please expand – variable performance in which aspects of climate simulation ?

Response: We meant the simulations conducted here will be affected by the model forcing or the ERA5 atmospheric component, which has variable performance in different geographic regions. We will revise as below.

*"Evaluation was conducted separately for different geographic regions because the atmospheric component of ERA5, used as HTESSEL forcing, has variable performance for high- and mid-latitudes."*

- Line 143: 'MLS with' – should this be changed to : 'A MLS with'

Response: Will be revised as suggested.

- Line 147: I do not see this range (0.6–3.0° and 1.7°C) reflected in the Table or figure. You say it is an improvement – but improvement with respect to what, and for which regions ? Lines 146-147 are not clear to me.

Response: The numbers are reduced wBias of aggregated daily soil temperature in high-latitude permafrost regions in Exp. MLS-Dis+Den comparing to ERA5L. We intend to revise this part as below to clarify.

*"The Exp. MLS-Dis+Den with  $c_{\xi} = 0.046 \text{ m}^3 \text{ kg}^{-1}$  performed best among the simulations (Figure 2G–I). Comparing to ERA5L, the Exp. MLS-Dis+Den reduced winter wBias of aggregated daily soil temperature and surface offset by about 0.6–3.0 °C (Figure 2G–J) and 1.7 ° (Figure 2K) at the observed sites in high-latitude permafrost regions (Table 2)."*

- Line 152: ... affecting soil thermal conductivity ? This could be another inaccuracy in HTESSEL

Response: Mostly thermal conductivity but also thermal capacity (that's why we used *"thermal properties"*). Lacking a representation of soil organic matter is thought to be a major uncertainty in soil temperature simulations, and the discussion will be added as below.

*"Summer soil temperatures in all experiments are similar since the revised snow scheme mainly affects winter temperatures. In North America and Alaska, soil temperatures are generally have a significant warm bias year round (Figure 2H and I). This is thought to be related to a lack of vertical variations of soil textures within the soil column in HTESSEL, which would allow a more sophisticated treatment of soil organic matter and its impact on soil thermal properties (Park, 2018)."*

- Line 161: it isn't appropriate to recent permafrost loss rates (2002-present) to future projections to 2040.

Response: The permafrost area changing rate during 1990–2040 from Lawrence et al. (2008) is generally linear (see Figure 5 from Lawrence et al. (2008)), and hence comparable.

- Line 174: "Temperature observations are access from Cao et al. (2020)" – > rephrase – > "Temperature observations were made available by the authors of Cao et al. (2020)."

Response: Will change to *"Temperature observations were made available by the authors of Cao et al. (2020)."* in a revised submission.

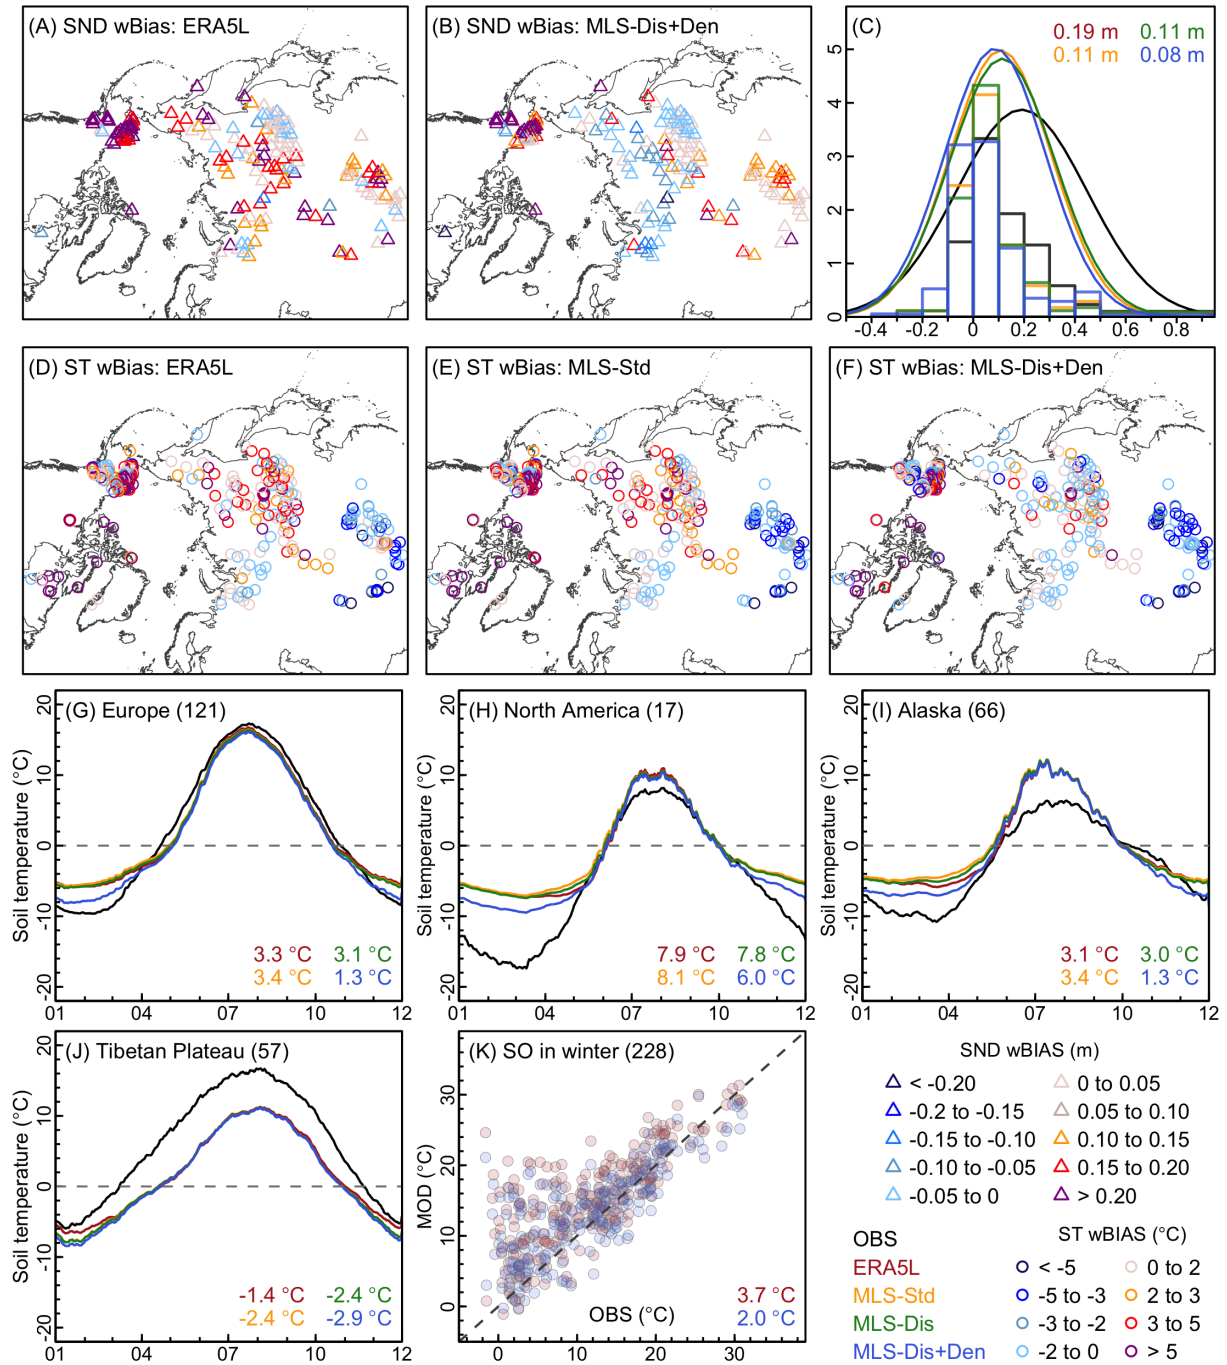

Figure 2: Evaluation of simulated snow depth and soil temperatures during 2001–2018. Weighted bias (wBias) of daily snow depth (SND) for ERA5-Land (ERA5L, A) and Exp. MLS-Dis+Den (B). The distribution of SND wBias for ERA5L and each simulation experiment (C). wBias of soil temperature (ST) for 0.07–0.28 m depth for ERA5L (D), Exp. MLS-Std (E), and Exp. MLS-Dis+Den (F). Soil temperature for 0.07–0.28 m depth in different permafrost regions (G–K), and winter (DJF) surface offset (SO, K). The number of unique grid cells where observed sites are located is given in the bracket. Color numbers are estimated snow depth and soil temperature bias in winter for observation (OBS) and each simulation experiments.



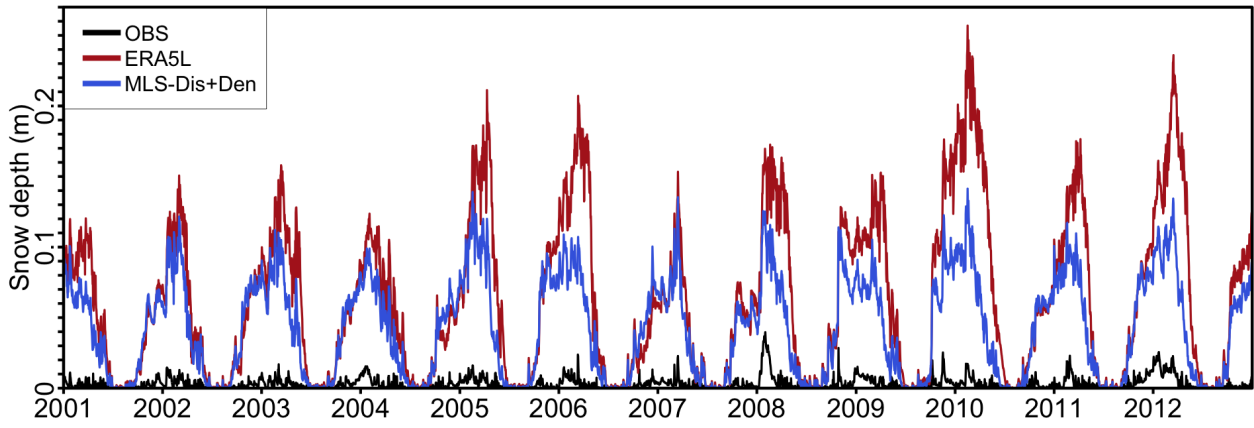

Figure Snow in TP: Aggregated daily snow depth over the Tibetan Plateau at observed sites (see Figure 2).

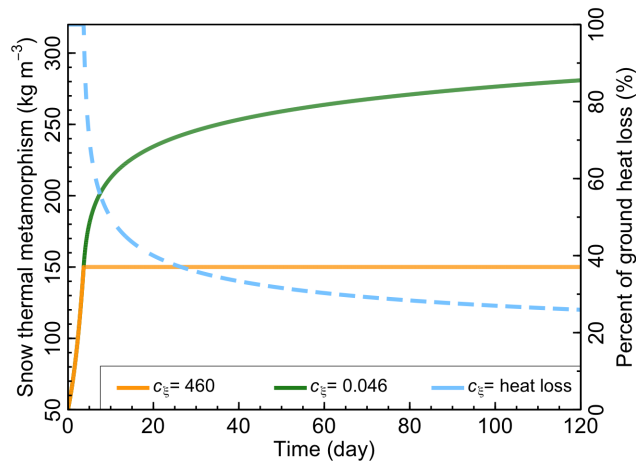

Figure 1: Snow compaction rate due to thermal (destructive) metamorphism (excluding liquid water) using different  $c_{\xi}$  in Eq. (6). The dashed line is the percent of ground heat loss through the snow layer in Exp. MLS-Dis+Den compared using the  $c_{\xi}$  of 0.046 ( $\text{kg m}^{-3}$ ) in ERA5L, Exp. CTRL, and Exp. MLS-Std (see text for description).

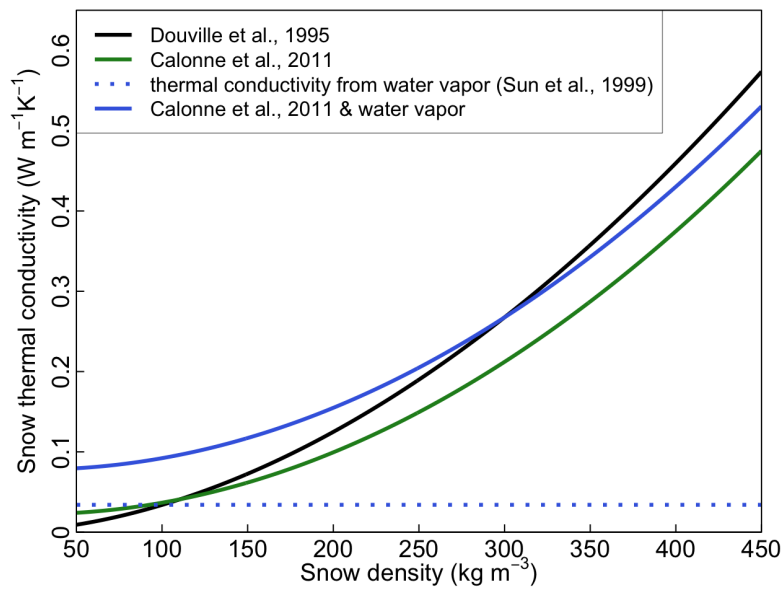

Figure Thermal conductivity: Comparisons of snow thermal conductivity treated in different ways. The influences of water vapour on snow thermal conductivity was estimated by setting snow temperature as  $-10^{\circ}\text{C}$ .

## References

- Calonne, N., Flin, F., Morin, S., Lesaffre, B., Du Roscoat, S. R., and Geindreau, C.: Numerical and experimental investigations of the effective thermal conductivity of snow, *Geophysical Research Letters*, 38, 1–6, <https://doi.org/10.1029/2011GL049234>, 2011.
- Cao, B., Zhang, T., Wu, Q., Sheng, Y., Zhao, L., and Zou, D.: Brief communication: Evaluation and inter-comparisons of Qinghai–Tibet Plateau permafrost maps based on a new inventory of field evidence, *The Cryosphere*, 13, 511–519, <https://doi.org/10.5194/tc-13-511-2019>, 2019.
- Fourteau, K., Domine, F., and Hagenmuller, P.: Impact of water vapor diffusion and latent heat on the effective thermal conductivity of snow, *The Cryosphere Discussions*, pp. 1–25, <https://doi.org/10.5194/tc-2020-317>, 2020.
- Gruber, S.: Derivation and analysis of a high-resolution estimate of global permafrost zonation, *The Cryosphere*, 6, 221–233, <https://doi.org/10.5194/tc-6-221-2012>, 2012.
- Lawrence, D. M., Slater, A. G., Romanovsky, V. E., and Nicolsky, D. J.: Sensitivity of a model projection of near-surface permafrost degradation to soil column depth and representation of soil organic matter, *Journal of Geophysical Research*, 113, F02 011, <https://doi.org/10.1029/2007JF000883>, 2008.
- Orsolini, Y., Wegmann, M., Dutra, E., Liu, B., Balsamo, G., Yang, K., de Rosnay, P., Zhu, C., Wang, W., Senan, R., and Arduini, G.: Evaluation of snow depth and snow cover over the Tibetan Plateau in global reanalyses using in situ and satellite remote sensing observations, *The Cryosphere*, 13, 2221–2239, <https://doi.org/10.5194/tc-13-2221-2019>, 2019.
- Park, S.: IFS doc-Physical processes, pp. 1–223, 2018.
- Sun, S., Jin, J., and Xue, Y.: A simple snow-atmosphere-soil transfer model, *Journal of Geophysical Research: Atmospheres*, 104, 19 587–19 597, <https://doi.org/10.1029/1999JD900305>, 1999.
